# Supplementary material for: Effect of sporadic destratification, seasonal overturn, and artificial mixing on CH 4 emissions from a subtropical hydroelectric reservoir
Source: Copernicus journal article supplement (doi:10.5194/bg-13-3647-2016), 2016-06-22

Supplement of Biogeosciences, 13, 3647–3663, 2016  
<http://www.biogeosciences.net/13/3647/2016/>  
doi:10.5194/bg-13-3647-2016-supplement  
© Author(s) 2016. CC Attribution 3.0 License.

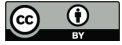

*Supplement of*

## **Effect of sporadic destratification, seasonal overturn, and artificial mixing on CH<sub>4</sub> emissions from a subtropical hydroelectric reservoir**

Frédéric Guérin et al.

*Correspondence to:* Frédéric Guérin ([frederic.guerin@ird.fr](mailto:frederic.guerin@ird.fr))

The copyright of individual parts of the supplement might differ from the CC-BY 3.0 licence.

Figure S1: Detailed view of the water intake (WI on Figure 1).

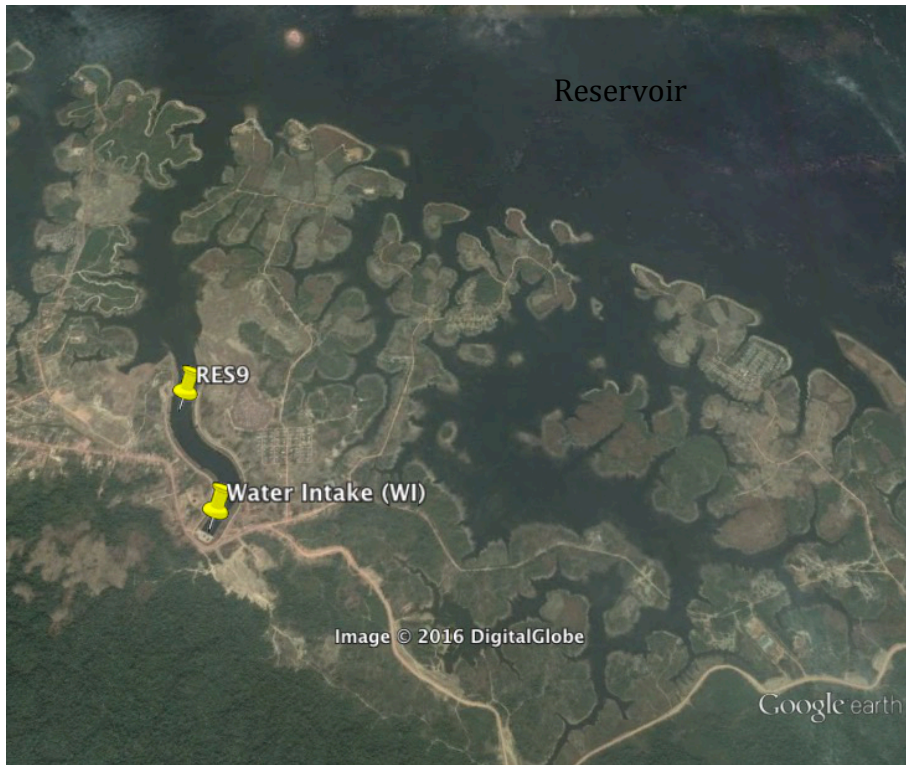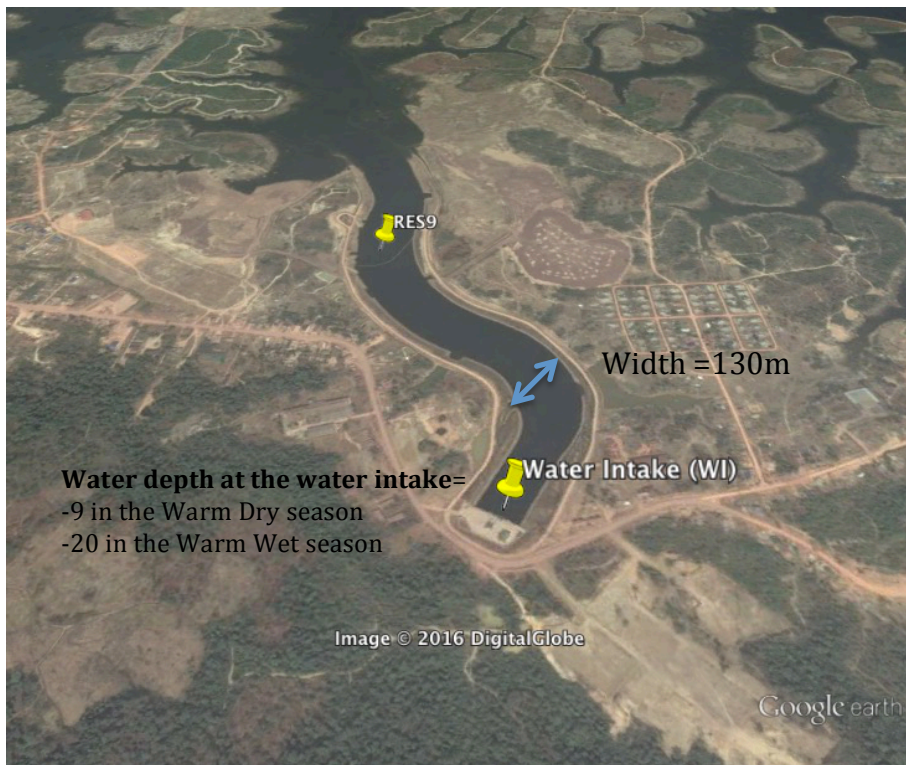

Figure S2 : Skewness of the resampled 15-days log concentration time series for the 9 stations

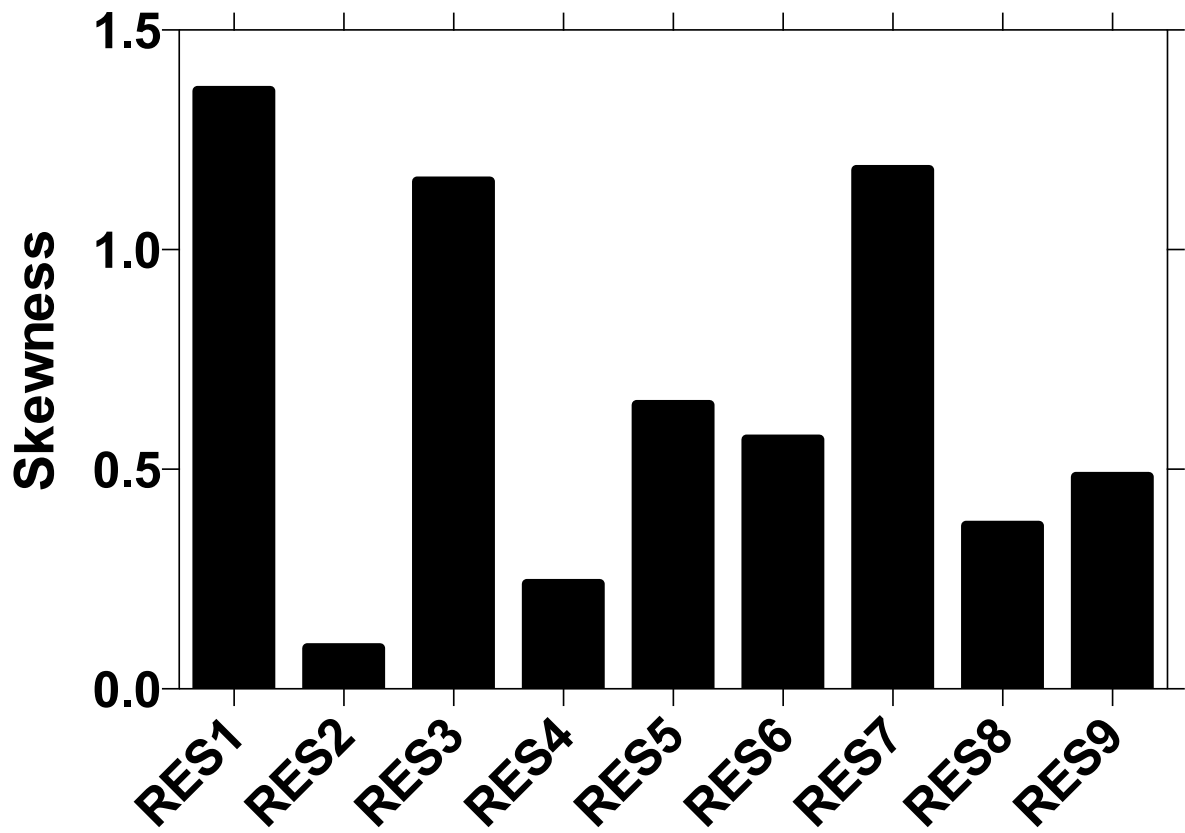

Figure S3 : Time series of (a) surface CH<sub>4</sub> concentrations ( $\mu\text{mol L}^{-1}$ ) and (b) diffusive fluxes ( $\text{mmol m}^{-2} \text{d}^{-1}$ ) at the stations RES1 to RES8 in the Nam Theun 2 Reservoir. On panel (b), warm dry season is in red, warm wet season in grey and cool dry season in blue)

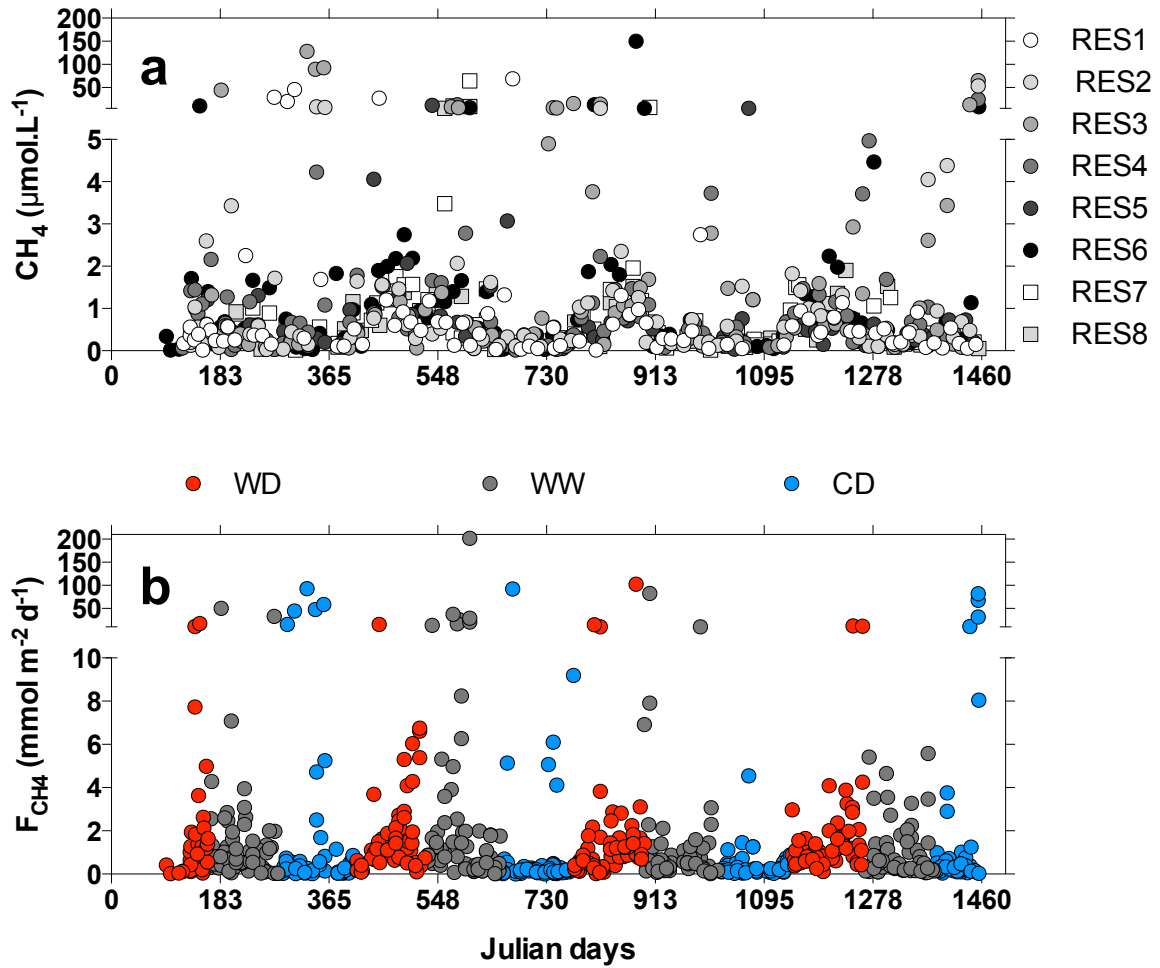

Figure S4 : Auto-correlation functions of the resampled 15-days log concentration for the 9 stations.

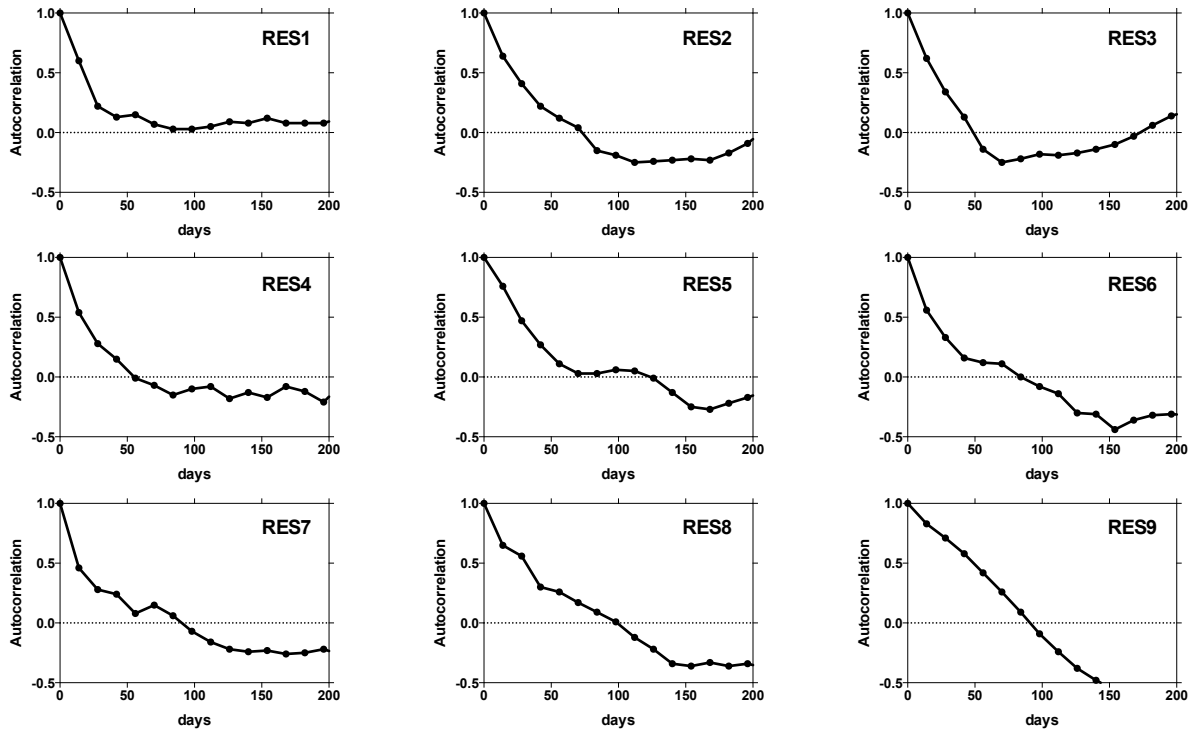

Supplement: Supplementary file 1 [file bg-13-3647-2016-supplement.pdf]
